# Supplementary material
Source: Springer Nature journal article supplement (https://www.springermedizin.de/resource/supplementary/12880_2009_75_MOESM6_ESM.pdf/9450490)

a)

CONDITIONAL INFERENCE TREE – Response: CVLT long delay  
 Inputs: Age, Gender, HIPPO\_nor

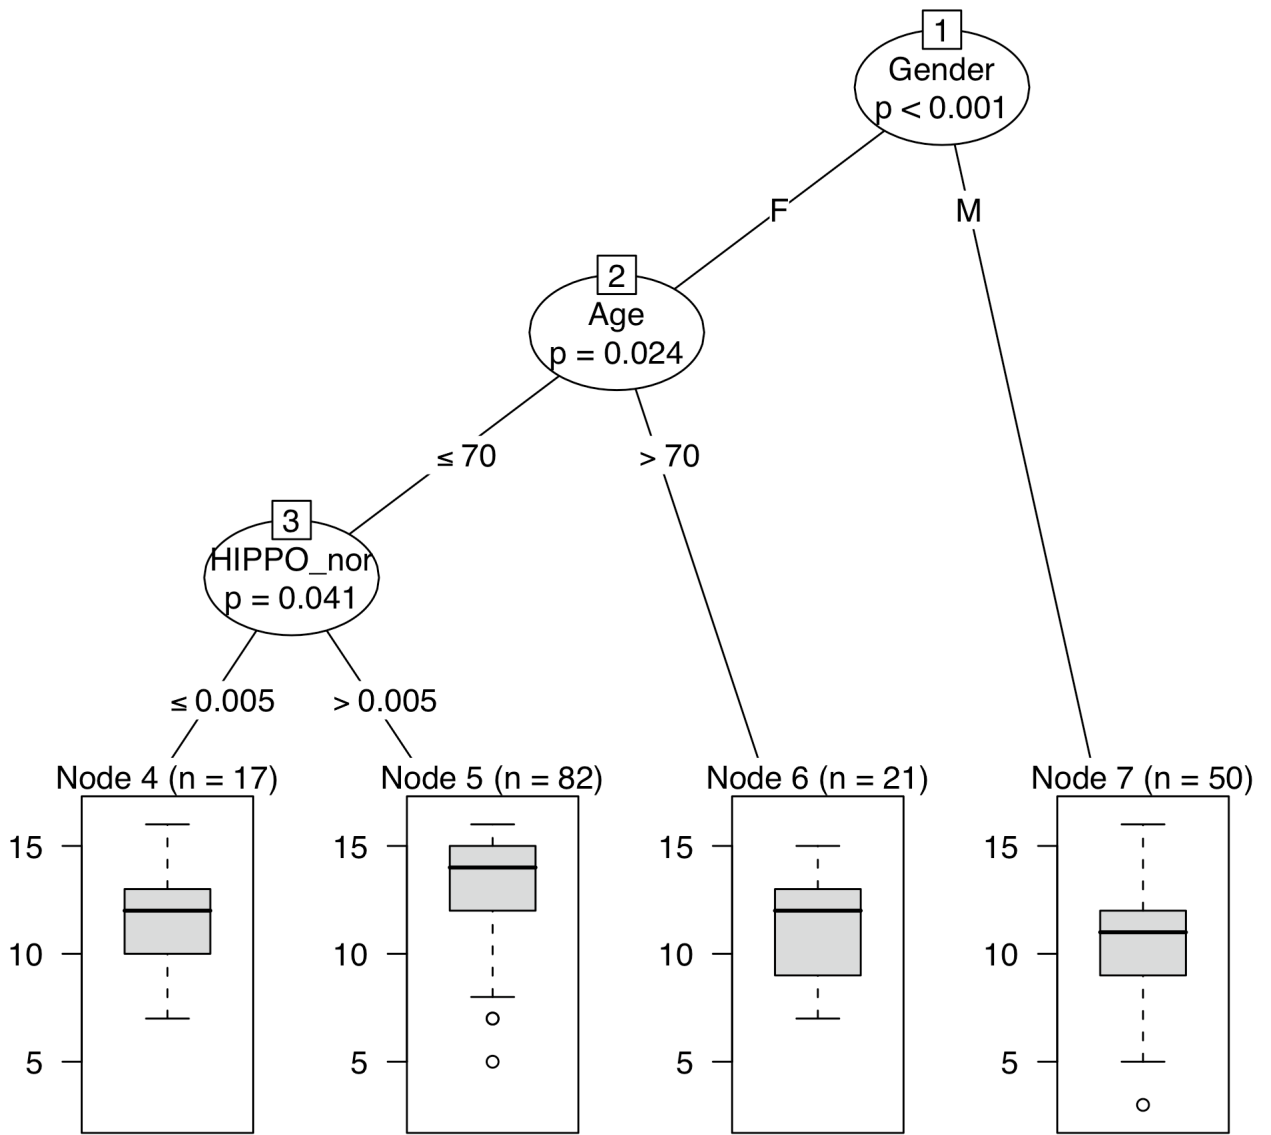

b)

CONDITIONAL INFERENCE TREE – Response: CVLT long delay  
 Inputs: Age, Gender, HIPPO\_nor, HIPPO\_LH\_nor, HIPPO\_RH\_nor, HIPPO\_LI, ApoE4

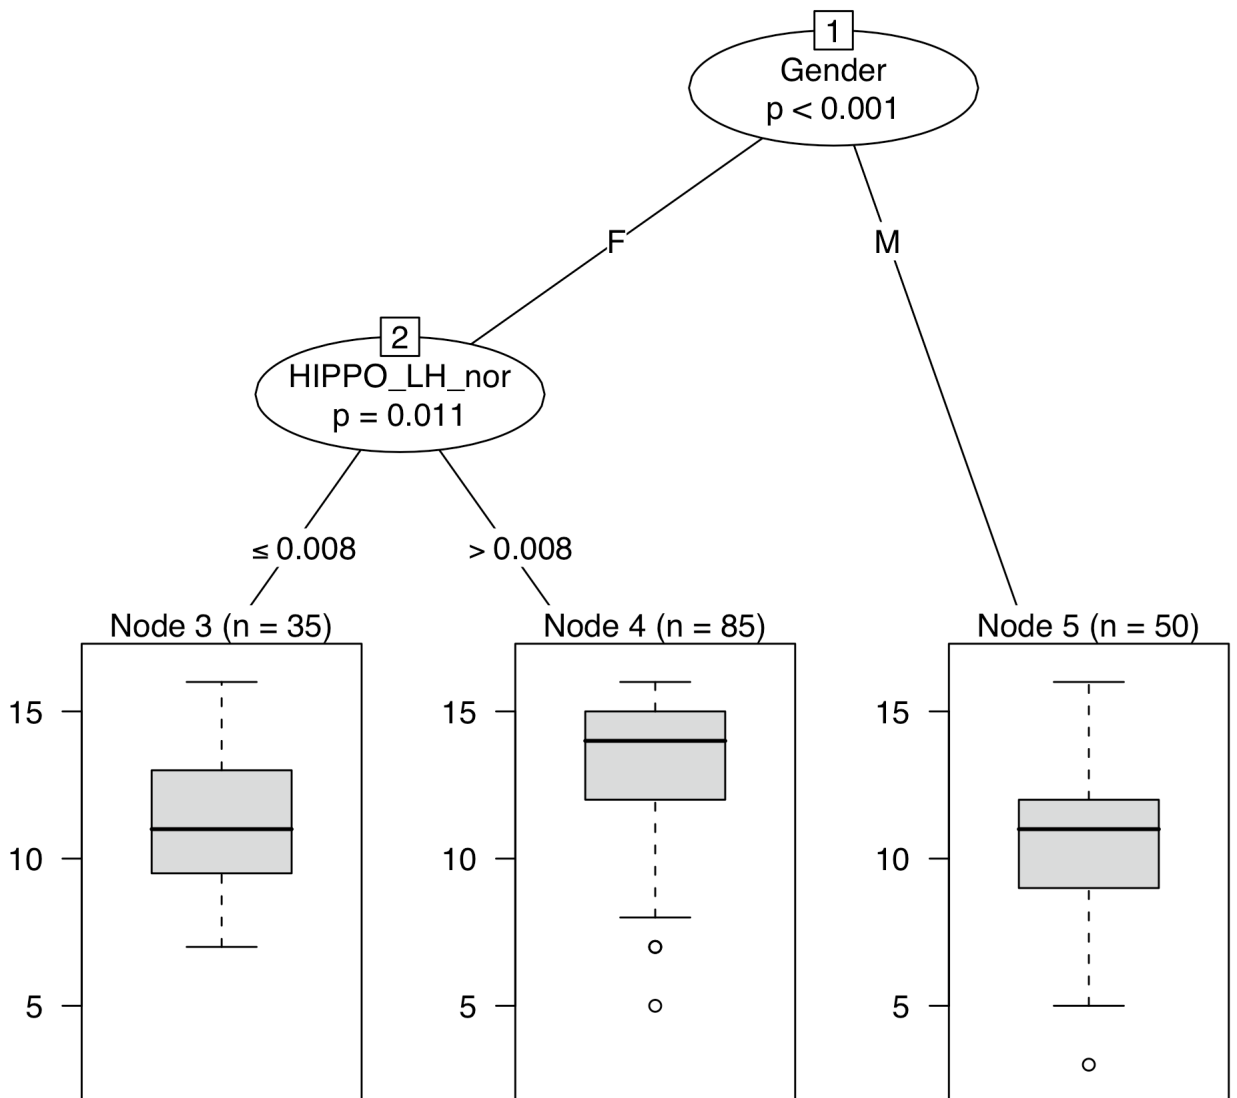

Supplement: MOESM6 [file 9450490]
